# Supplementary material for: Antrocin Sensitizes Prostate Cancer Cells to Radiotherapy through Inhibiting PI3K/AKT and MAPK Signaling Pathways
Source: PubMed Central journal article supplement (PMC6356781; doi:10.3390/cancers11010034), 2018-12-31
Supplement: cancers-11-00034-s001.pdf [file cancers-11-00034-s001.pdf]

# Supplementary Materials: Antrocin Sensitizes Prostate Cancer Cells to Radiotherapy through Inhibiting PI3K/AKT and MAPK Signaling Pathways

Yu-An Chen, David T.W. Tzeng, Yi-Ping Huang, Chun-Jung Lin, U-Ging Lo, Chia-Lin Wu, Ho Lin, Jer-Tsong Hsieh, Chih-Hsin Tang and Chih-Ho Lai

## Supplementary Materials

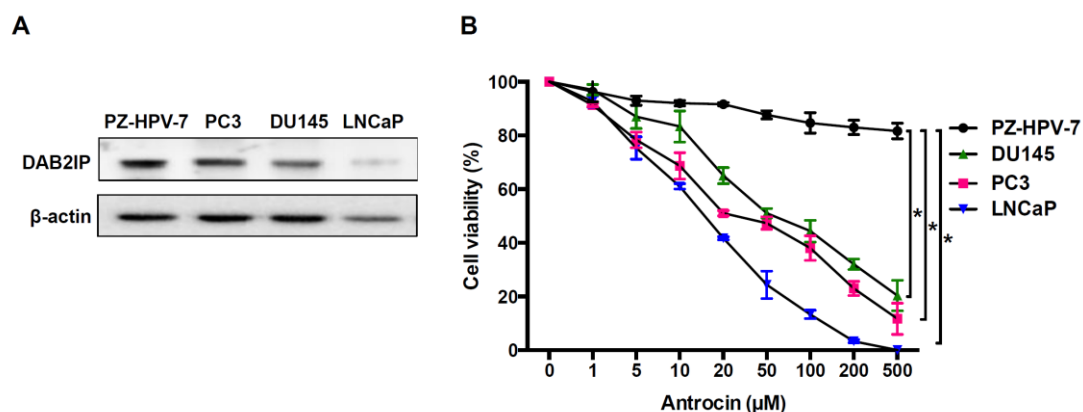

**Figure S1.** Antrocin inhibits the cell proliferation of parental PCa cells. (A) Cell lysates of PZ-HPV-7, PC3, DU145, and LNCaP were prepared for the analysis of DAB2IP expression using the Western blot assay.  $\beta$ -actin was used as a loading control. (B) PZ-HPV-7, PC3, DU145, and LNCaP cells were treated with various concentrations of antrocin (0, 1, 5, 10, 20, 50, 100, 200, and 500  $\mu$ M) for 48 h. Cell proliferation was assessed by using the WST-1 assay. Statistical significance was evaluated by two-way ANOVA (\*,  $p < 0.01$ ).

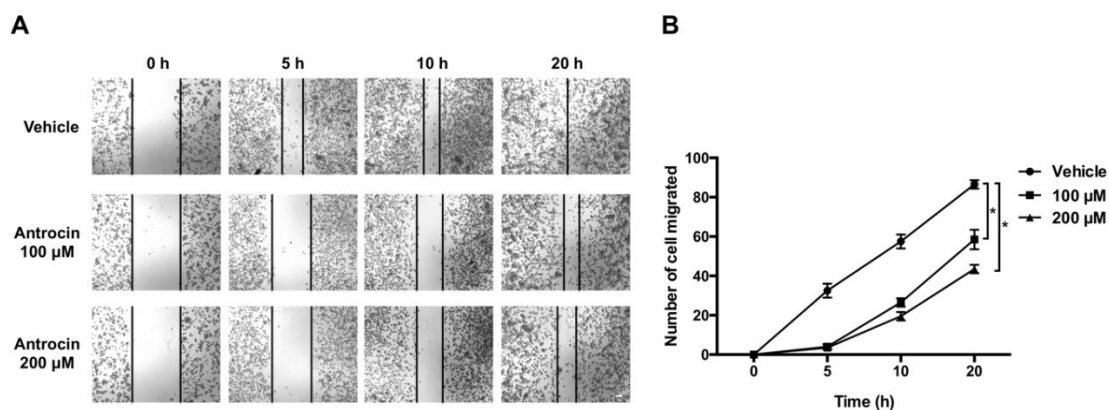

**Figure S2.** Antrocin inhibits the migration of PC3-KD cells. The migration activity of PCa cells was evaluated under a microscope (10 $\times$  magnification) through a wound-healing assay. (A) The representative images of the wound-healing assay are displayed. After being scratched with a 200- $\mu$ L pipette tip, PC3-KD cells were vehicle-treated or treated with antrocin (100 and 200  $\mu$ M), then images were taken at 0, 5, 10, and 20 h. (B) Quantitative analysis of the migration inhibition assay. Statistical significance was evaluated by two-way ANOVA (\*,  $p < 0.01$ ). Scale bar, 100  $\mu$ m.

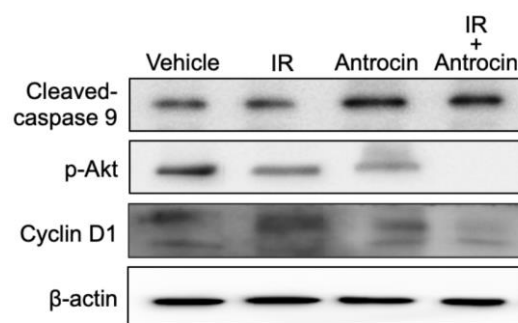

**Figure S3.** Co-treatment with IR and antrocin inhibits the expression of cell cycle and apoptotic markers in xenograft PCa tissue. The expression levels of cleaved-caspase 9, p-Akt, and cyclin D1 from tumor tissues were analyzed by Western blot assay.  $\beta$ -actin was used as a loading control.

Table S1. Microarray profiling and data analysis.

| 2x Up or Down | Fold change     | Fold change    | Fold change     | Gene Symbol | Ensembl ID      | Entrez GeneID | Genbank Accession | Genomic Coordinates       |
|---------------|-----------------|----------------|-----------------|-------------|-----------------|---------------|-------------------|---------------------------|
| Probe Name    | C+IR vs Control | C+A vs Control | A+IR vs Control |             |                 |               |                   |                           |
| A_23_P67278   | 3.08            | 24.96          | 31.99           | ZNF443      | ENST00000301547 | 10224         | NM_005815         | chr19:12541400-12541341   |
| A_23_P14174   | 2.07            | 26.82          | 23.15           | TNFSF13B    | ENST00000486502 | 10673         | NM_006573         | chr13:108922693-108922752 |
| A_33_P3283971 | -2.09           | -4.56          | -4.09           | NFKBIL1     | ENST00000376148 | 4795          | NM_005007         | chr6:31526381-31526440    |
| A_33_P3369034 | -3.13           | -3.99          | -5.89           | BCAR1       | ENST00000393422 | 9564          | NM_001170714      | chr16:75263017-75262958   |
| A_33_P3733417 | 2.12            | 5.53           | 5.35            | DRD2        | ENST00000362072 | 1813          | NM_000795         | chr11:113280398-113280339 |
| A_23_P133386  | -2.07           | -2.37          | -2.47           | RASGRF2     | ENST00000265080 | 5924          | NM_006909         | chr5:80521773-80521832    |
| A_33_P3317825 | 3.50            | 6.90           | 13.34           | NRAS        | ENST00000369535 | 4893          | NM_002524         | chr1:115251224-115251165  |
| A_23_P168556  | 2.29            | 2.00           | 2.10            | STX1A       | ENST00000222812 | 6804          | NM_004603         | chr7:73113602-73113543    |
| A_23_P76951   | 2.41            | 3.69           | 5.72            | TMX1        | ENST00000457354 | 81542         | NM_030755         | chr14:51722559-51722618   |
| A_23_P137765  | 5.48            | 10.09          | 16.32           | PAFAH2      | ENST00000374284 | 5051          | NM_000437         | chr1:26288337-26288278    |
| A_23_P412990  | -2.47           | -2.60          | -3.23           | HRH3        | ENST00000340177 | 11255         | NM_007232         | chr20:60790021-60790017   |
| A_23_P500464  | 2.10            | 7.10           | 11.41           | COL2A1      | ENST00000380518 | 1280          | NM_001844         | chr12:48367008-48366949   |
| A_23_P313961  | 2.27            | 5.89           | 7.12            | NME6        | ENST00000418431 | 10201         | NM_005793         | chr3:48336122-48336063    |
| A_23_P116653  | -3.18           | -3.68          | -4.95           | BCL2L14     | ENST00000396369 | 79370         | NM_138722         | chr12:12240295-12243746   |
| A_23_P156807  | 2.01            | 2.07           | 2.70            | CFLAR       | ENST00000594734 | 8837          | NM_001202519      | chr2:202030660-202030717  |
| A_23_P77459   | 3.28            | 44.81          | 55.78           | NAE1        | ENST00000563221 | 8883          | NM_001018159      | chr16:66836909-66836850   |

**Table S2.** Primers that were used in the qRT-PCR analysis.

| Gene Name       | Primers                                                         |
|-----------------|-----------------------------------------------------------------|
| <i>TMX1</i>     | 5'-CAATGAATCAACTGACCATTACG-3'<br>5'-GGAGAGGGCTTTAAAGAAAAGTTG-3' |
| <i>CFLAR</i>    | 5'-CAGCATCCTAAGGCAGAAGAA-3'<br>5'-GGGAAAGGTGGGGAAAAGAT-3'       |
| <i>BCL2L14</i>  | 5'-AGGGTCTCTCCTTCCAGCTC-3'<br>5'-TCTTCCAAGTATCTCCTGAA-3'        |
| <i>PAFAH2</i>   | 5'-TGCTGCTTGATAACTGGGTA -3'<br>5'-TCCATCAAGGTCCCAGAAAAG-3'      |
| <i>BCAR1</i>    | 5'-CCAGTGCAGTTGGTGTGTC-3'<br>5'-TTTGTCTTCTCTTTAAAAACTT-3'       |
| <i>COL2A1</i>   | 5'-TTCGGACTTTTCTCCCCTCT-3'<br>5'-ACTCAGGGGGCATTGACT-3'          |
| <i>NFKBIL1</i>  | 5'-AGATTGAGACCTGGGAGCTGAND-3'<br>5'-ATCCTTCCCTTACCCTTCCCTT-3')  |
| <i>NAE1</i>     | 5'-CTGCTCAAGAGGTCATCAAAAT-3'<br>5'-CAGACTAAAGCACAACCCGAAG-3'    |
| <i>NME6</i>     | 5'-AGGGAGGTGTCCACTATGTAGC-3'<br>5'-AGCAGAAATGGCACTGTAAGC-3'     |
| <i>NRAS</i>     | 5'-GACCAGACAGGGTGTGAAGAT-3'<br>5'-TGAAAGTGGCTCTTTCTGACA-3'      |
| <i>RASGRF2</i>  | 5'-GTTTGGGTCAAAGACAGATGCT-3'<br>5'-CCCATCTGACATTCCCTTATGT-3'    |
| <i>TNFSF13B</i> | 5'-GGGACTGAAAATCTTGAACCA-3'<br>5'-CCTTTTGTATAGTTGGTGTTCCTACT-3' |
| <i>ZNF443</i>   | 5'-CTCGACATAAAAGGACTCACACA -3'<br>5'-ATTCATACGGCTTCTCTCCA-3'    |
| <i>HRH3</i>     | 5'-CTTTCCATTCTGGGTGTTTC-3'<br>5'-CCTCAGCAATTTGTCTCTCTTG-3'      |
| <i>DRD2</i>     | 5'-CTAAGAGGCTGCTGAAAACCAT-3'<br>5'-TGGAAGGTGACTCGTCAAAGTT-3'    |
| <i>STX1A</i>    | 5'-CTCCCTCGGCTTTACTCCTG-3'<br>5'-TTTCTCTGGTACAGATACAAATGTT-3'   |
| <i>GAPDH</i>    | 5'-AACGGATTTGGTCGTATTGGG-3'<br>5'-CAGGGGTGCTAAGCAGTTGG-3'       |

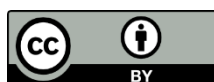

© 2018 by the authors. Submitted for possible open access publication under the terms and conditions of the Creative Commons Attribution (CC BY) license (<http://creativecommons.org/licenses/by/4.0/>).
